# Supplementary material for: <em>De Novo </em>Venom Gland Transcriptome Assembly and Characterization for <em>Calloselasma rhodostoma</em> (Kuhl, 1824), the Malayan Pit Viper from Malaysia: Unravelling Toxin Gene Diversity in a Medically Important Basal Crotaline
Source: Preprints.org preprint supplement (doi:10.20944/preprints202304.0125.v1), 2023-04-07
Supplement: Supplementary file 1 [file supplementary]

# De novo venom gland transcriptomics of the Malayan Pit Viper, *Calloselasma rhodostoma* (Kuhl, 1824) from Malaysia: Unravelling diversity of toxin genes in a medically important basal crotaline

## Supplementary File 2. Low abundance transcripts

| Accession      | Amino acid sequence |                                                                   |
|----------------|---------------------|-------------------------------------------------------------------|
| V8NV17 CRiSP   | 1                   | MAKNPSIPWLIPTLFLFLTHGIHCFFLPNATHLENILNQYQDGQPHSRAKRSISRSDQD 60    |
| LCCL domain_Oh | 61                  | EILMLHNKLRGEVYPSASNMEYM-----NSTHFPAGQRLF 120                      |
|                | 121                 | HPLHRSPSFHVQSWYDEVKDYTPYPHECNPCPDRCCTGPMCTHYTQMVMWATTNKIGCAI 180  |
|                | 181                 | NVCKRIDVWGEVWENAVYLVCNYSKGNWIGEAPYKNGRSCSECPSPSYGGGCRANLCYKE 240  |
|                | 241                 | KVVEKPETDRANEVELQKVPVRIQPKSVKPTKEKKPTEVNYMTQVIKCDTKMRDTCRGST 300  |
|                | 301                 | CNRYLCPAGCLNSKAKVGFPPKYESASSICRAAIHSGVLDNRGGLVDITRKGRSDDFFVMS 360 |
|                | 361                 | VRNGVQTFISKYKPSNGFAVSKVTVTLDCTTVEELCPFKKPTTHCPRRLKSSSRKAKRE 420   |
|                | 421                 | SHNPSMPAMEQMCKNSSICKAAVHAGVIGDSSGGYVDVMPVDKKKVYNGSLRNGIRSESL 480  |
|                | 481                 | KTPREGKAFRIFAVRQ 496                                              |
| Cr-CRP01       | 1                   | MAKNPTVPWL VAPSLFLFLTHGIQCFFLP SATHLERILNQYQDGQPHSRGKRSISRDDR 60  |
|                | 61                  | EILTLHNKLRGEVYPSASNMEYMRWDEELERSAESWAQQCIWDHGPA SLLLSIGQNLAVH 120 |
|                | 121                 | WGRHRSPGYHVQSWYDEVKDYTPYPHECNPRCPDRCRGVPCTHYTQMVMWATTKNMGCAI 180  |
|                | 181                 | NVCKRMVWGEVWENAVYLVCNYSKGNWIGEAPYKNGRPCSECPSPSYGGGCQANLCYKE 240   |
|                | 241                 | KAVEKSETDRANEVEIQKVPDRIQPKSVKPAKEKKPVEVTYMTQAICKDTKMRDTCRGST 300  |
|                | 301                 | CNRYLCPAGCLNSKAKVGFPPNYESASSICRAAIHSGVLDNRGGLVDITRKGRSDDFFVMS 360 |
|                | 361                 | VRNGIRTLSKHKPSNGFAVLKVIQVTLDCYTTVEELCPFKKPTTHCPRSYCPAYCKNE-P 420  |
|                | 421                 | NHWATVYGTNIYADNSSICKAAVHAGVIGDSSGGYVDVMPVDKKKVYNGSLRNGIRSESL 480  |
|                | 481                 | KTPREGKAFRIFAVRQ 496                                              |

Sequence alignment of Cr-CPR01 (Putative cysteine-rich secretory protein (CRiSP)) identified in *Calloselasma rhodostoma* venom gland transcriptome in comparison to selected CRiSP retrieved from UniProtKB database, Cysteine-rich secretory protein LCCL domain-containing 2, UniProtID: V8NV17. Abbreviation: Oh – *Ophiophagus hannah*

| Accession      | Amino acid sequence |                                                                    |
|----------------|---------------------|--------------------------------------------------------------------|
| V5NTD 5'NUC Ca | 1                   | MQTPKRRRGAQGCPRSSPS--PPLLLLVRVAVWFCAALSVAAGSFELTILHTNDVHARVEQ 60   |
|                | 61                  | TSRDSGKCTGQDCYGGVARRATKIRELRAKHRHVLLLDAGDQYQGTWVFNFFKGREVVVF 120   |
|                | 121                 | MNSLRDAMALGNHEFDNGLAGLLDPLLKHANFPILSANIRPKGSIASNISGYILPYKII 180    |
|                | 181                 | NVGSEKVGIIIGYTTKETPVLSNPGPYLEFRDEVEELQNHANKLTTLGVNKIIALGHSGLF 240  |
|                | 241                 | EDQRIARKVKGVDDVVVGHTNTFLYTGSPPSTEVAAGNYPFMVQSDDGQVPPVQAYAFG 300    |
|                | 301                 | KYLGYLNVIFDDKGNVIKSSGNPILLNKDISEDQDIKAEVNKMKIQLHNYSSQEIGKTIV 360   |
|                | 361                 | YLNGTQACRFHECNLGNLICDAVIYNNVRHPDDNEWNHVMCIVNGGGIRSPIDERTNN 420     |
|                | 421                 | GTITLEELTAVLPFGGTFDQLQIKGSALKQAFEHSVHRHGEHGMGELLQVSGIKVVYDLR 480   |
|                | 481                 | KPGSRVLSLNLCTECRVPTYVPLEKEKTYKLLPSFLAAGGDGYHMLKGDSSNHSSGNL 540     |
|                | 541                 | DISIVGDYIKRMGKVFPAVEGRMIFSAAGTLFQAQLFTWGLCVSLLYFIL 590             |
| Cr-NUC01       | 1                   | MQTPKR--GTPGCPPSPSPPPPPPLLVGAVWFCALLSLAASFELTLLHTNDVHARVEQ 60      |
|                | 61                  | TSRDSGKCTGQECYGGVARRATKIRELRAKHRHVLLLDAGDQYQGTIWFNFFFKGREVVTF 120  |
|                | 121                 | MNRLRYDAMALGNHEFDNGLAGVLDPLLKYASFPILSANIIPKGPIASNISGYILPYKII 180   |
|                | 181                 | NVGSEKVGIIIGYTTKETPVLSNPGPYLEFRDEVEELQKHVNKLTTLGVNKKIALLGHSGLF 240 |
|                | 241                 | EDQRIAQKVKGVDDVVIGHTNTFLYTGTTPSTEVAAGNYPFMVQSDDGQVPPVQAYAFG 300    |
|                | 301                 | KYLGYLNVIFDDKGNVIKASGNPILLNKDIPEDQDVKTEVNKMKIQLHNYSSQEIGKTIV 360   |
|                | 361                 | YLNGTTHACRFHECNLGNLICDAVIYDNVRHPDDNEWNHVMCIINGGGIRSPIDERANN 420    |
|                | 421                 | GTITLEELTAVLPFGGTFDQLQVKGDAKQAFEHSVHRHGGQGTGELLQTSIGIKVVYDLR 480   |
|                | 481                 | RPGMRVSLKVLCTECRVPTYVPLETGKTYKLLPSFLASGGDGYHMLKGDASNHSSGNL 540     |
|                | 541                 | DISIVGDYIKRMGKVFPAVEGRMIFSAAGTLFQAQLFTWALCISLLYFIL 590             |

Sequence alignment of Cr-NUC01 (Putative 5'nucleotidase (5'NUC)) identified in *Calloselasma rhodostoma* venom gland transcriptome in comparison to selected 5'NUC

retrieved from UniProtKB database, Snake venom 5'-nucleotidase, UniProtID: F8S0Z7.  
Abbreviation: Ca – *Crotalus adamanteus*

| Accession              | Amino acid sequence |                                                                   |
|------------------------|---------------------|-------------------------------------------------------------------|
| A0A2H4N395 PLB-like Bm | 1                   | MIRFGNPSSS-----DKRRQRCRSWCWGG-LLLLWAVAETRA DIHYATVYWLEAEKSFQIK 60 |
|                        | 61                  | DVLDKNGDAYGYNDTIQSTGWGILEIKAGYGNQPI SNEILMYAAGFLEGYLTASHMSDH 120  |
|                        | 121                 | FANLFPLMIKNVIEQKVDFIQKQDEWTRQQIKNNKDDPFWRNAGYVIAQLDGLYMGNV 180    |
|                        | 181                 | EWAKRQKRTPLTDFEISFLNAIGDLLDIPALQSTLRKSDFRSMPDVPRIYQWDMGHCSA 240   |
|                        | 241                 | LIKVLPGYENIYFAHSSWFTYAATLRIYKHLDFKITDPQTKTGRASFSSYPGFLSSLDDF 300  |
|                        | 301                 | YILGSGLTMLQTTNSVLNLSLLKKVVPESLFAWERVRIANMMADSGKTWAETFEKQNSGT 360  |
|                        | 361                 | YNNQYMILDTKKIKLQRSLEDGTLYIEQVPKLVKYS DQTKVLRNGYWPSYNIPFDKEIY 420  |
|                        | 421                 | NMSGYGEYVQRHGLEFSYEMAPRAKIFRRDQGKITDMESMKSIMRYNNYKEDPYAKRNPC 480  |
|                        | 481                 | NTICCRQDLDRRTPVPAGCYDSKVADISMAAKFTAYAISGPTVEKGLPVFSWVNFNKT KH 540 |
|                        | 541                 | QGLPESYNFDFVTM KPVL 558                                           |
| Cr-PLB01               | 1                   | MIRLGHPSSSSSSWEKRRQRCRSWSWG LLLLLWAVAETRA DIHYATVYWLEAEKSFQIK 60  |
|                        | 61                  | DVLDKNGNAYGYNDTIQSTGWGILEIKAGYGNQPI SNEILMYAAGFLEGYLTASHMSDH 120  |
|                        | 121                 | FANLYPLMIKNVIEQKVDFIQKQDKWTRQQIKNNKDDPFWRNAGYVIAQLDGLYMGNV 180    |
|                        | 181                 | EWAKRQKKTPLTIFKISFLNAVGDLLDIPALYSNLRKSDVRSMPDVPRIYQWDMGHCSA 240   |
|                        | 241                 | LIKVLPGYENIYFAHSSWFTYAATLRIYKHLDFKITDPQTKTGRASFSSYPGFLVSLDDF 300  |
|                        | 301                 | YILGNGMVLQTTNSVFNLSLLKKVVPESLFAWERVRIANMMADSGKTWAETFEKQNSGT 360   |
|                        | 361                 | YNNQYMIIDTKIKLRRSLEDGTLYIVEQVPKLVKYS DQTKVLRNGYWSSYNIPFDKVIY 420  |
|                        | 421                 | NISGYGEYVQRFGLFSYEMAPRAKIFRRDQGKVTDMESMKSIMRYNNYKEDPYAKHNPC 480   |
|                        | 481                 | NTICCRQDLDRRSPVPAGCYDSKVTDISMAAKFTAYAINGPPVEKGLPVFSWIDFNKTKH 540  |
|                        | 541                 | QGLPESYNFDFVIM KPVL 558                                           |

Sequence alignment of Cr-PLB01 (Putative phospholipase B (PLB)) identified in *Calloselasma rhodostoma* venom gland transcriptome in comparison to selected PLB retrieved from UniProtKB database, Phospholipase B-like, UniProtID: A0A2H4N395. Abbreviation: Bm – *Bothrops moojeni*

| Accession     | Amino acid sequence |                                                                    |
|---------------|---------------------|--------------------------------------------------------------------|
| V8P8E3 NLB Oh | 1                   | ----- 60                                                           |
|               | 61                  | ----MCWKPMGISGKNYKQMPMPTSSKELDFVGH SVRTKLDLKRQEVSRLRMLLKAKMD 120   |
|               | 121                 | ATMEQDVQVDHLALLKQFEHLDSQNQHTFEARDLELLIKTATKDLENYDAAHHEEFKRYE 180   |
|               | 181                 | MMKEHERREY LKSLDEEKREEEAHFEELKKKHKEHPKVNVP-TPTVMGCWMSRNRHFS 240    |
|               | 241                 | LRSGGVEFREM QFEHSRGAPAKEV---FFLQLEKVYDPRNEEDDMLEMEEEERLRMREHVM 300 |
|               | 301                 | KNVDLNKDRLVTLDEFVKSTQRKEFNEADGWETVEETQIYSEAE LQRFEAE LKAQEEELS 360 |
|               | 361                 | RRAEQLHQEHKELQQRQVELDAQKEYQQVVLQMEQRKSQQLEQAPQVGP GGELKFQAQP 420   |
|               | 421                 | PHAAPADHASPPESQPGAPGAPEHDSQKDQTEALQNQAHEVAVQ 480                   |
| Cr-NLB01      | 1                   | QIRWRTTLLQQCVLLTTYIVII LEAVPIDVDKTKVKEEEKDSATVENPDTGLYYDAYLRQ 60   |
|               | 61                  | VIEVLETDKHFREKLQTADIEQIKSGKLSKELDLVG HKVRTKLDLKRQEVARLRMLIKA 120   |
|               | 121                 | KIDAYQDSGVDHQALLKQFGHLNHNPNHTFEVKDL DMLIKTATHDLENYDNERHEEFKKY 180  |
|               | 181                 | EMMKEHERREY LKTLDEEKRHQEEAKYEDMKKKHNDHPKVNHPGSKDQLKEVWEEADGLD 240  |
|               | 241                 | PNDFDPKTF FFKLHDVNADGFLDEQELEALFTRELEKVYDPRNEEDDMVEMEEERLRMREH 300 |
|               | 301                 | VMNEVDINKDRLVTL EEFMRATEKREFLEPENWETLDQQQVFTEDDLKEFESHIVQKEDE 360  |
|               | 361                 | LQKQALELQKKREELQQQQDFLQAQKQELEMAVKQMEQKKLQQGH-PPSGPGGELKFQ-- 420   |
|               | 421                 | -PSVSQLD-GNVQNHVPVAPGNI PVQEAARS DHVQSH----- 480                   |

Sequence alignment of Cr-NLB01 (Nucleobindin (NLB)) identified in *Calloselasma rhodostoma* venom gland transcriptome in comparison to selected NLB retrieved from UniProtKB database, Nucleobindin-1, UniProtID: V8P8E3. Abbreviation: Oh – *Ophiophagus hannah*

| Accession     | Amino acid sequence |                                                               |
|---------------|---------------------|---------------------------------------------------------------|
| B1Q3K2 NGF Pf | 1                   | MSMLCYTLIIAFLIGIWAAPKSEDNVPLGSPATSDLSDTSCAKTHEALKTSRNTDQHYP   |
|               | 61                  | PKKAEDQEFGSAANIIVDPKLFQKRRFQSPRVLFSTQPPPLSRDEQSVDNANSLNRNIRS  |
|               | 121                 | KREDHPVHNRGEYSVCDSSVSVWVANKTTATDIRGNLVTVMVDVNLNNNVYKQYFFETKCR |
|               | 181                 | NPNPVPTGCRGIDSRHWNSYCTTTHTFVRALTMEGNQASWRFIRIDTACVCVISRKNENF  |
|               | 241                 | G                                                             |
| Cr-NGF01      | 1                   | MSMLCYTLIIAFLIGIWAAPKSEDNVPLGSPATSDLSDNCAKTHEALKTSRNTDQHYP    |
|               | 61                  | PKKAEDQEFGSAANIIVDPKLFQRRRFQSPRVLFSTQPPPLSRDEQSVDNANSLNRNIRA  |
|               | 121                 | KREDHPVHNRGEYSVCDSSVSVWVANKTTATDIRGNVVTVMVDINLNNNAYKQYFFETKCR |
|               | 181                 | NPNPVPTGCRGIDARHWNSYCTTTHTFVRALTMEGNQASWRFIRIDTACVCVISRKN---  |
|               | 241                 | -                                                             |

Sequence alignment of Cr-NGF01 (Putative nerve growth factor (NGF)) identified in *Calloselasma rhodostoma* venom gland transcriptome in comparison to selected NGF retrieved from UniProtKB database, Nerve growth factor, UniProtID: B1Q3K2. Abbreviation: Pf – *Protobothrops flavoviridis*

| Accession      | Amino acid sequence |                                                              |
|----------------|---------------------|--------------------------------------------------------------|
| P67862 VEGF Pf | 1                   | MAAYLLAVAILFCIQGWPSGTVQGQVMPFMEVYSRSACQTRETLVPILKEYPDEVSHLFK |
|                | 61                  | PSCVPVLRGCGCCSDESLTCTATGKHSVGREIMRVDPHKGTSKMEVMQFKEHTACECRPR |
|                | 121                 | SPGDVNNGKDKRNPEEGGPRARFPFV                                   |
| Cr-NLB01       | 1                   | MAAYLLAVAILFCIQGWPSGTVQGQVMPFMEVYSRSACQTRETLVPILKEYPDEVSHLFK |
|                | 61                  | PSCVPVLRGCGCCSDESLTCTATGKHSVGREIMRVDPHKGTSKMEVMQFKEHTACECRPR |
|                | 121                 | SPGDVNNGKDKRNPEEGGPRARFPFV                                   |

Sequence alignment of Cr-VGF01 (Snake venom vascular endothelial growth factor (VEGF)) identified in *Calloselasma rhodostoma* venom gland transcriptome in comparison to selected VGF retrieved from UniProtKB database, Snake venom vascular endothelial growth factor toxin, UniProtID: P67862. Abbreviation: Pf – *Protobothrops flavoviridis*

| Accession                    |         | Amino acid sequence                                                                                          |           |
|------------------------------|---------|--------------------------------------------------------------------------------------------------------------|-----------|
| P60615 Alpha bungarotoxin Bm | 1<br>61 | MKTLTLLTLVVVTIVCLDLGYTIVCHTTATSPISAVTCCPPGENLCYRKMWCDAFCSRRGKV<br>VELGCAATCPSKKPYEEVTCSTDKCNPHPKQRPG         | 60<br>120 |
| Cr-FTX01                     | 1<br>61 | MKTLTLLTLVVVTIVCLDLGYTIVCHTTATSPISAVTCCPPGENLCYRKMWCDAFCSRRGKV<br>VELGCAATCPSKKPYEEVTCSTDKCNPHPKQRPG         | 60<br>120 |
| Q7ZT13 NTX-like Bm           | 1<br>61 | MKTLTLLTLVVLTIACLDLGYTKTCFNDDLTNPKTTELCRHSMYFCFKNSWIAGGVERIER<br>GCSLTCPDIKYNKYIYCCTRDNCNA                   | 60<br>120 |
| Cr-FTX02                     | 1<br>61 | MKTLTLLTLVVLTIACLDLGYTKTCFNDDLTNPKTTELCRHSMYFCFKNSWIAGGVERIER<br>GCSLTCPDIKYNKYIYCCTRDNCNA                   | 60<br>120 |
| Q8JFX7 MTX Bm                | 1<br>61 | MKTLTLLTLVVVTIICLDLGYTEMCMCVRPYPFMSSCCPEGQDRCYKSYWVNENGGKQKKYHG<br>KYPVILERGCVTACTGPGSGSIYNLYTCCPTNRCGSSSTSG | 60<br>120 |
| Cr-FTX03                     | 1<br>61 | -----TLVVVTIICLDLGYTEMCMCVRPYPFMSSCCPEGQDRCYKSYWVNENGGKQKKYHG<br>KYPVILERGCVTACTGPGSGSIYNLYTCCPTNRCGSSSTSG   | 60<br>120 |
| P15817 Kappa bungarotoxin Bm | 1<br>61 | MKTLTLLSLVVVTIVCLDLGYTRTCLISPSSTPQTCPNGQDICFRKAQCDNFCNHRGPVIEQG<br>CVATCPQFRSNYRSLCCRTDNCNH                  | 60<br>120 |
| Cr-FTX04                     | 1<br>61 | -----CLDLGYTRTCLISPSSTPQTCPNGQDICFRKAQCDNFCNHRGPVIEQG<br>CVATCPQFRSNYISLLCCRTDNCN-                           | 60<br>120 |
| Q9YGI0 Gamma bungarotoxin Bm | 1<br>61 | MKTLTLLTLVVVTIVCLDLGYTMQCKTCSFYTCNPSETCPDGKNICVKRSWTAVRGDGPKREI<br>RRECAATCPPSKLGLTVFCCTTDNCNH               | 60<br>120 |
| Cr-FTX05                     | 1<br>61 | -----VCLDLGYTLKCKTCPFYNCNPSETCPGGKNICVKRSWTAVRGDGPKHEI<br>RRECAATCPPKPGGLTVFCCTTDNCNH                        | 60<br>120 |
| A5X2W6 3FTX Sce              | 1<br>61 | MKTLVLVILGVVAFVYLDGYSLECYSCNMFTFSILPLKLCRSVMCEGLDQCYINKTLFPV<br>LKIEKGCTTNCQTWTDKCCETNKNII                   | 60<br>120 |
| Cr-FTX06                     | 1<br>61 | -----VAMFYFNHLGYSIQCYQCNNPCSRRLV-----MTCPESLRQCYTNKTDTS<br>GRPAGKGCTMNCIENEQIKCCNTSRCN--                     | 60<br>120 |
| Q9YGI8 SNTX Bm               | 1<br>61 | MKTLTLLTLVVVTIICLDLGYTRKCLIKYSQANESSKTCPSGQLLCLKKWEIGNPSGKEVK<br>RGCVATCPKPKKNEIIQCCAKDKCNK                  | 60<br>120 |
| Cr-FTX07                     | 1<br>61 | -----TLVVLTIIVCLDLGYTRKCLIKYSQANESSKTCPSGQLLCLKKWEIGNPSGKEVK<br>RGCVATC-----                                 | 60<br>120 |
| A5X2W7 3FTX Sce              | 1<br>61 | MKTLVTGVVAFVYLEPGYSLICEACNLPNCDFLPPPCPKGFNQCYKKWNILGLSVMNIE<br>RGCTANCTPNAQTKCCNTNLCNA                       | 60<br>120 |
| Cr-FTX08                     | 1<br>61 | -----GYSIQCYQCNNP-CSRRVLMTCPESLRQCYT--NKTDTSGRPAG<br>KGCTMNCIENEQIKCCNTSRCN-                                 | 60<br>120 |
| F5CPD4 3FTX Ma               | 1<br>61 | MKALLFALFLVAFLEKDPVKSMQCYKCGVSGCHLKITCSEDEKFCYKRYNKISFIRTYGCAK<br>TCTEENNWTASVYCCTTNLCNT                     | 60<br>120 |
| Cr-FTX09                     | 1<br>61 | -KALLSALLLVAFLEKDPVKSMCEYRCGVSGCHLKITCSAEETFCYKWLNKIS-----<br>-----                                          | 60<br>120 |

Sequence alignment of Cr-FTX01, Cr-FTX02, Cr-FTX03, Cr-FTX04, Cr-FTX05, Cr-FTX06, Cr-FTX07, Cr-FTX08, Cr-FTX09 (Three-finger toxin (3FTX)) identified in *Calloselasma rhodostoma* venom gland transcriptome in comparison to selected 3FTX retrieved from UniProtKB database, Alpha bungarotoxin, UniProtID: P60615; Neurotoxin-like protein, UniProtID: Q7ZT13; Muscarinic toxin, UniProtID: Q8JFX7; Kappa bungarotoxin, UniProtID: P15817; Gamma bungarotoxin, UniProtID: Q9YGI0; 3FTX, UniProtID: A5X2W6, A5X2W7 and F5CPD4; Short neurotoxin, UniProtID: Q9YGI8. Abbreviation: NTX – Neurotoxin; MTX – Muscarinic toxin; 3FTX – Three-finger toxin; SNTX – Short neurotoxin; Bm – *Bungarus multicinctus*; Sce – *Sistrurus catenatus edwardsii*; Ma – *Micrurus altirostris*

| Accession     | Amino acid sequence |                                                                    |
|---------------|---------------------|--------------------------------------------------------------------|
| T2HQN1 APP Oo | 1                   | MQGMDIEDKSSKMHCMKGKHVAIICGVVIAVGLILGLGLGLKPEACNPDPEDNGQVSTK 60     |
|               | 61                  | PPTSSTPDVTNPSSSVFCSAKNDENGAWTNFRLPNYVHPVHYDLDLTPEMEADEVYTG MV 120  |
|               | 121                 | NISIRLEEQTTRHLWLHLRETKITEMPQLRISSGQVIEIKRCFGYEPQEYVVVEAEEDLR 180   |
|               | 181                 | PGNYFLSMKFKGYLNGSLVGFYSTTYGENGKTKYIAATDHEPTDARKSFPCFDEPNKKAT 240   |
|               | 241                 | YTISITHEQDYEAISNMPVEKTISLDNKWTKTIFKKSVPMSSTYLVAVAVHQFKYEERISA 300  |
|               | 301                 | RGIPLRVYAQPQQINTAIYAANVTKVVFDFYFENYFNMNYSPLKLDKIAIPDFGTGAMENW 360  |
|               | 361                 | GLITYRETNLLYDSRESAASNKQRVAAVVAHELHVQWFGNIVTMDWDDLLWLNFGFASFF 420   |
|               | 421                 | EFMGVNATEEKWQMLDQILIDLLPVLKDDSLVSSHPIITVNVSSPDEITSVFDGISYSKG 480   |
|               | 481                 | ASILRMLEDWISPDHFRAGCQKYLKDHYFKNAKTDDFWKAMQEVSGKPVREVMDTWTRQM 540   |
|               | 541                 | GYPVLKVALNSTVTQQRFLDPKADPSKPFSSQFSYKWNIPVKWKEGNTSSITFYNKSEVA 600   |
|               | 601                 | GITITRPSNLPDPSFLKVNKDHVGFYRVNYPEQVWRTLADIMMKDQNFNLADRAGFIDD 660    |
|               | 661                 | AFALARAGLLKYADALNLTRYLQNETEYIPWQRAVVAVSYIGQMVEDDKALYPKFQRYFG 720   |
|               | 721                 | SLVKPIASELKWENEDHIKSLRLTTVLEFACNMDDPEALGNASLLFKNWTSGISLDVNL 780    |
|               | 781                 | RLLVYRFGMQHSGDEEAWNYMFEKYRTATLAQEKEKLLYGLASVKNITLLNRFLNCKNT 840    |
|               | 841                 | TLIRSQDVFTVLRYISFNSYGKTMAWDWRLNWEYLVKRYTLNDRNLGRLISRISGTFNT 900    |
|               | 901                 | ELQLWQMFNFERYPDAGAGEASRKQALETTKSNIEWLQYRDDVATWLENSE----- 960       |
| Cr-APP01      | 1                   | MQGMDIEDKSSKMPCKMGKHVAIICGVVIAVGLILGLGLGLKPEACSPDPEDNGQVSTQ 60     |
|               | 61                  | PPTSSTPDVTSASGSSVFCSAQNDEIGAWSNFRLPVSVLPVHYDLDLTPEMEADEVYTG MV 120 |
|               | 121                 | NISIRLEKLTTKHLWLHLRETKITEMPQLRTSSGQVIEIKRCFGYEPQEYVVVEAEELR 180    |
|               | 181                 | PGNYFLSMKFKGYLNGSLVGFYSTTYGENGKTKYIAATDHEPTDARKSFPCFDEPNKKAT 240   |
|               | 241                 | YTISITHERDYEAISNMPVEKTISLDNKWTKTIFKKSVPMSSTYLVAVAVHQFKYEERISS 300  |
|               | 301                 | RGIPLRVYAQPQQINTAIYAANVTKVVFDFYFENYFNMNYSPLKLDKIAIPDFGTGAMENW 360  |
|               | 361                 | GLITYRETNLLYDSQESAASNKQRVAAVVAHEVVHQQWFGNIVTMDWDDLLWLNFGFASFF 420  |
|               | 421                 | EFMGVNATEEKWQMLDQILIDLLPVLKDDSLVSSHAITVNVSSPDEITSVFDGISYSKG 480    |
|               | 481                 | ASILRMLEDWISPDQFKAGCQKYLTDHYFKNAKTDDFWKAMQVVSQKPVKEVMDTWTRQM 540   |
|               | 541                 | GYPVLKVALNSTITQQRFLDPKADPSQPFSSQFSYKWNIPVKWKEGNTSSITFYNKSELA 600   |
|               | 601                 | GITITRPSDAPPDSFLKVNKDHVGFYRVNYPEVWHALANIMMKDQNFNLADRAGFIDD 660     |
|               | 661                 | AFALARAGLLKYADALNLTRYLQNETEYIPWQRAVVAVSYIGQMVEDDKALYPKFQRYFG 720   |
|               | 721                 | SLVKPIASELKWENEDHIKSLRLTTVLEFACNMDDPEALGNASLLFKNWTSGISLDVNL 780    |
|               | 781                 | RLLVYRFGMQNSGDEQAWNYMFEKYRTATLAQEKEKLLYGLASVKNITLLNRFLSCIKNT 840   |
|               | 841                 | TLIRSQDVFTVLRYISFNSYGKTMAWDWRLNWEYLVKRYTLNDRNLGRLISRISGTFNT 900    |
|               | 901                 | ELQLWQMFNFERYPDAGAGEASRKQALETTKSNIEWLQYRDDVATWLENSEQTNFI 960       |

Sequence alignment of Cr-APP01 (Aminopeptidase A (APP)) identified in *Calloselasma rhodostoma* venom gland transcriptome in comparison to selected APP retrieved from UniProtKB database, Aminopeptidase, UniProtID: T2HQN1. Abbreviation: Oo – *Ovophis okinavensis*

| Accession     | Amino acid sequence |                                                                    |
|---------------|---------------------|--------------------------------------------------------------------|
| J3SEZ3 PDE Ca | 1                   | MIQQKVLFI SLVAVTLGLGLGLKESVQPQVSCRYRCNETFSKMASGCSCDDKTERQA 60      |
|               | 61                  | CCSDYEDTCVLPTQSWSCSKLRCEKRIANVLCSCSDDCLEKKDCCTDYKSICKGETSWL 120    |
|               | 121                 | KDKCASSGATQCPAGFEQSPLILFSMDGFRAGYLENWDLSMPNINKLKTCGTHAKYMRV 180    |
|               | 181                 | YPTKTFVNHYTIATGLYPESHGIIIDNNIYDVNLNLFSLSSSTARNPAWWGGQPIWHTAT 240   |
|               | 241                 | YQGLKAATYFWPGSEVKINGSYPTIFKNYNKSI PFARVTEVLKWLDPKAKRPDFTLY 300     |
|               | 301                 | IEEPDTTGHKYGPVSGEIIKALQMA DRTLGMLEGLKQRNLHNCVNLI LADHGMEEISC 360   |
|               | 361                 | DRLEYMANYFNNVDFMYEGPAPRIRSKNVPKDFYTFDSEGI VKNLTCRKPKQYFKAYLS 420   |
|               | 421                 | KDLPKRLHYANNIRIDKVNLMVDQQWMAVRDKKFTRCKGGTHGYDNEFKSMQAI FLAHGP 480  |
|               | 481                 | GFNEKNEVTSFENIEVYNLMCDLLKLPAPNNGTHGSLNHLLKNPFYTPSPA KEQSSPLS 540   |
|               | 541                 | CPFGPVPSPDVSGCKCSSITELEKVNQRLN LNNAKTESEAHNLPYGRPQVLQNH SKYCL 600  |
|               | 601                 | LHQAKYISAYSQDILMPLWSSYTIYRSTSTSVPPSASDCLRLDVRI PAAQSQTCSNYQPD 660  |
|               | 661                 | LTITPGFLYPNPNFSSNFEQYDALITSNIVPMFKGFTRLWNYFHTTLIPKYARERNGLNV 720   |
|               | 721                 | ISGPIFDYNDGHFDSYDTIKQHVNTKIPIPTHYFVVLTSCE NQINTPLNCLGPKVLVS 780    |
|               | 781                 | FILPHRPDNSESCADTSPENLWVEERI QIHTARVRDVLLTGLNFYSGLKQPLPETLQLK 840   |
|               | 841                 | TFLPIFVNPVN 900                                                    |
| Cr-PDE01      | 1                   | ----- 60                                                           |
|               | 61                  | ----- 120                                                          |
|               | 121                 | -----FEQSPLILFSMDGFRAGYLEAWESLMPNINKLKICGTHAKYMR A 180             |
|               | 181                 | YPTKTFVNHYTIVTGLYPESHGIIIDNNMYDVNLNLFSLSSSVAKNPAWWGGQPIWNTVT 240   |
|               | 241                 | YQGLKAATYFWPGSEVKINGSYPTIYKNYNKSM PFARVTEVL SWLDLPKAERP DFTLY 300  |
|               | 301                 | IEEPDTTGHQYGPVSGQVIKALQMA DQTLGMLEGLKQRNLHNCVNLI LADHGMEEISC 360   |
|               | 361                 | NRLEYMDSYFNKVDFMYEGPAPRIRSKNVPKDFYTFDSEGI VKNLTCRNPKQYFKAYLS 420   |
|               | 421                 | KDLPKRLHYVNNVRIDKVNLMVDEKWM AVRDKKFSRCKGGTHGYDNEFKSMQAI FLAHGP 480 |
|               | 481                 | GFKGKNEVTSFENIEVYNLLCDLLKLPAPNNGTHGSLNHLLKNPFYTPSPA KEQSSPLS 540   |
|               | 541                 | CPFGPTSPDVSGCKCSITNLEKVNQRLN LNDAQIVSEVNNLPYGRPQVL RNDNKYCL 600    |
|               | 601                 | LHQTKYISAYSQDILMPLWSSYTIYRSQRTSVPPSALDCLRLDVRI PAVQSQICSNYQTD 660  |
|               | 661                 | LTITPGFLYPNPNFSSNFEQYDALITSNIVPMFKGFTRLWNYFHTI LLPKYAKERNGVN 720   |
|               | 721                 | ITGPIFDYNDGHFDSYGTIKEHVINTKIPIPTHYFVVLTSCE NQINTPLNCLGPKVLVS 780   |
|               | 781                 | FILPHRPDNSESCADTSPENLWVEERI QIHTARVRDVLLTGLNFYSGLKQPLPETLQLK 840   |
|               | 841                 | TFLPIFESP-- 900                                                    |

Sequence alignment of Cr-PDE01 (Phosphodiesterase (PDE)) identified in *Calloselasma rhodostoma* venom gland transcriptome in comparison to selected PDE retrieved from UniProtKB database, Phosphodiesterase, UniProtID: J3SEZ3. Abbreviation: Ca – *Crotalus adamanteus*

| Accession      | Amino acid sequence |                                                                 |
|----------------|---------------------|-----------------------------------------------------------------|
| Q8AY45 KSPI Bc | 1                   | MSSGGLLLLLLGLLTLWAELTPVSSRKRHPDCDKPPDTKICQTVVRAFYKPSAKRCVQFR 60 |
|                | 61                  | YGGCNGNGNHFKSDHLRCCECLEYP 120                                   |
| Cr-KUN01       | 1                   | -SSGGLLLLLLGLLTLWAELTPVSSRKRHPDCDKPPDTKICQTVVRAFYKPSAKRCVQFR 60 |
|                | 61                  | YGGCNGNGNHFKSDHLRCCECLEYP 120                                   |

Sequence alignment of Cr-KUN01 (Kunitz-type Serine Proteinase Inhibitor (KSPI)) identified in *Calloselasma rhodostoma* venom gland transcriptome in comparison to selected KSPI retrieved from UniProtKB database, Kunitz-type serine protease inhibitor, UniProtID: Q8AY45. Abbreviation: Bc – *Bungarus candidus*
